# 1 Polygenic Risk Score Improves the Accuracy of a Clinical Risk Score for Coronary Artery Disease

2 Austin King<sup>1</sup>, Lang Wu<sup>2</sup>, Hong-Wen Deng<sup>3</sup>, Hui Shen<sup>3</sup>, Chong Wu<sup>1</sup>

3  
4 1. Department of Statistics, Florida State University, Tallahassee, FL, USA

5 2. Cancer Epidemiology Division, Population Sciences in the Pacific Program, University of Hawaii  
6 Cancer Center, University of Hawaii at Manoa, Honolulu, HI, USA

7 3. Center of Bioinformatics and Genomics, Department of Global Biostatistics and Data Science,  
8 Tulane University, New Orleans, LA, USA

## 9 Abstract

10  
11 **Background:** The value of polygenic risk scores (PRS) towards improving guideline-recommended clinical  
12 risk models for coronary artery disease (CAD) prediction is controversial. Here we examine whether an  
13 integrated polygenic risk score improves prediction of CAD beyond pooled cohort equations.

14 **Methods:** An observation study of 291,305 unrelated White British UK Biobank participants enrolled  
15 from 2006 to 2010 was conducted. A case-control sample of 9,499 prevalent CAD cases and an equal  
16 number of randomly selected controls was used for tuning and integrating of the polygenic risk scores. A  
17 separate cohort of 272,307 individuals (with follow-up to 2020) was used to examine the risk prediction  
18 performance of pooled cohort equations, integrated polygenic risk score, and PRS-enhanced pooled co-  
19 hort equation for incident CAD cases. Performance of each model was analyzed by discrimination and  
20 risk reclassification using a 7.5% threshold.

21 **Results:** In the cohort of 272,307 individuals (mean age, 56.7 years) used to analyze predictive accuracy,  
22 there were 7,036 incident CAD cases over a 12-year follow-up period. Model discrimination was tested  
23 for integrated polygenic risk score, pooled cohort equation, and PRS-enhanced pooled cohort equation  
24 with reported C-statistics of 0.640 (95% CI, 0.634-0.646), 0.718 (95% CI, 0.713-0.723), and 0.753 (95% CI,  
25 0.748-0.758), respectively. Risk reclassification for the addition of the integrated polygenic risk score to  
26 the pooled cohort equation at a 7.5% risk threshold resulted in a net reclassification improvement of

27 0.117 (95% CI, 0.102 to 0.129) for cases and -0.023 (95% CI, -0.025 to -0.022) for noncases [overall:  
28 0.093 (95% CI, 0.08 to 0.104)]. For incident CAD cases, this represented 14.2% correctly reclassified to  
29 the higher-risk category and 2.6% incorrectly reclassified to the lower-risk category.

30 **Conclusions and Relevance:** Addition of the integrated polygenic risk score for CAD to the pooled cohort  
31 questions improves the predictive accuracy for incident CAD and clinical risk classification in the White  
32 British from the UK biobank. These findings suggest that an integrated polygenic risk score may enhance  
33 CAD risk prediction and screening in the White British population.

34

## 35 **Background**

36 Cardiovascular disease (CVD) is a major cause of death worldwide.<sup>1</sup> Risk estimates for CVD have  
37 become particularly important for disease prevention and clinical practice.<sup>2,3,4,5</sup> Current guidelines from  
38 the American College of Cardiology and American Heart Association suggest lipid-lowering treatments  
39 for individuals with greater than a 7.5% 10-year absolute risk of developing CVD based on pooled cohort  
40 equations (PCE).<sup>6</sup> Because of the central role of accurate risk estimates in CVD prevention, improving ac-  
41 curacy beyond those already used in clinical practice like PCE, could save lives by better identifying high  
42 risk individuals.

43 Substantial advancements have been made over the past decades in identifying genetic variants  
44 associated with coronary artery disease (CAD).<sup>7,8,9,10</sup> Recent advances in polygenic risk scores (PRSs) have  
45 sparked a great interest in enhancing disease risk prediction by using the information on millions of vari-  
46 ants across the genome.<sup>11,12,13,14</sup> However, population health utility of PRSs in CAD risk prediction is con-  
47 troversial. Several studies have shown that PRSs can improve risk prediction accuracy for incident and  
48 prevalent CAD cases compared with individual conventional risk factors<sup>15,16</sup> and combining risk prediction  
49 models (like PCE) with PRS improves the performance in terms of net reclassification improvement.<sup>17</sup> On  
50 the other hand, several studies<sup>18,19</sup> integrating PRSs into PCE to assess possible clinical utility have con-  
51 cluded that the current benefits of incorporating PRSs were minimal (although statistically significant)  
52 and were not considered clinically significant to warrant their use over current clinical used prediction  
53 models. In this manuscript, we investigate why different studies have reached different and controver-  
54 sial conclusions. Specifically, we analyzed UK Biobank data to test the hypothesis that integrated PRSs  
55 leveraging multiple newly developed PRS methods, and several genome-wide association study (GWAS)  
56 datasets, can improve risk prediction for CAD over the widely used PCE and thus provide improved clini-  
57 cal utility in European populations.<sup>9,20,21,22,23,24,25</sup> Furthermore, in secondary analysis, we extended our  
58 integrated method to analyze its predictive performance in non-European populations.

## 59 **Methods**

### 60 **Study Populations**

61 Our study utilized the UK Biobank which includes 502,536 participants ranging in age from 40 to  
62 69 at baseline recruitment.<sup>26</sup> Biomarker data were collected from stored serum and red blood cells, de-  
63 tails of which are described elsewhere.<sup>27</sup> Ethical approval for the UK Biobank study was obtained from  
64 the National Health Service's National Research Ethics Service North West (11/NW/0382). The current  
65 research project (application number 48240) was approved by UK Biobank. Our study design is outlined  
66 in **Figure 1**.

67 The primary endpoint for our study was CAD, for which several large GWAS results are availa-  
68 ble.<sup>8,9,25</sup> We limited our primary investigation to unrelated White British individuals (as defined by UK  
69 Biobank data-field 22006) to reduce the influence of population heterogeneity and related samples; un-  
70 related individuals were obtained by only keeping individuals with no relative 3<sup>rd</sup> degree or closer.<sup>28</sup> We  
71 further excluded outliers for heterozygosity or genotype missing rates ( $0.2 >$  missing rate). Participants  
72 with inconsistent reported and genotypic inferred sex and withdrawn consent were likewise removed.

73 In secondary analysis, we focused on African ancestry participants in the UK Biobank. Following  
74 others,<sup>29,30</sup> we used imputed data released by the UK Biobank to determine continental ancestry (African  
75 (AFR), East Asian (EAS), European (EUR), South Asian (SAS)) and projected participants onto genetic prin-  
76 cipal components calculated in the 1000 Genome Project (N= 2000: AFR = 504; EAS = 504; EUR = 503;  
77 SAS = 489). We excluded populations identified as African Caribbeans in Barbados (ACB) and Americans  
78 of African Ancestry in SW (ASW) from the AFR population and all individuals of American ancestry (AMR)  
79 due to their complex admixture patterns. Participants were assigned to ancestries based on likelihoods  
80 calculated from their first 5 principal components. Samples were assigned via random forest to an an-  
81 cestry when their likelihood for a given ancestry was  $> 0.3$ . If two ancestries exceeded 0.3, we assigned

82 ancestries as: AFR over EUR, SAS over EUR, and EUR over EAS. Participants were excluded if no likeli-  
83 hood was > 0.3 or if 3 ancestry groups were > 0.3 (n = 8). The same quality control used in primary analy-  
84 sis was then applied to the resulting AFR ancestry population.

85 The study population was divided into (1) a case-control study (tuning dataset) established from  
86 prevalent CAD cases (see Cardiovascular Outcome Definitions Subsection for details) and randomly se-  
87 lected controls and (2) an independent prospective cohort study (testing dataset) of participants with no  
88 history of CAD at baseline recruitment. The tuning dataset was used for building risk prediction models  
89 and the testing dataset was used for unbiasedly evaluating their performance. Of note, there were no  
90 overlapping participants between these two datasets, ensuring the testing results were valid.

#### 91 **Definition of Risk Score Variables**

92 The updated pooled cohort equation (PCE) model, a clinically used risk prediction model, was  
93 used as our baseline. We matched variables available in the cohort to the predictors of the updated  
94 PCE,<sup>3</sup> including information on age, sex, race and ethnicity, smoking status, total and HDL cholesterol,  
95 systolic blood pressure, diabetes, and the use of lipid lowering and blood pressure lowering medica-  
96 tions. Definitions for Type 1 and Type 2 diabetes, blood pressure lowering and lipid lowering medica-  
97 tions use as well as categorization of smoking status were defined based on UK-recommended QRISK3  
98 scores.<sup>31,32</sup> Details of variable definitions and protocol for handling missing values are relegated to the  
99 eMethods section of Supplementary.

#### 100 **Figure 1. Study Design and Flowchart for Coronary Artery Disease (CAD)**

101 A. Selection of PRS in case-control study

102

103 B. Cohort Study

104

105

## 106 **Cardiovascular Outcome Definitions**

107           The UK Biobank data have been linked to Hospital Episode Statistics (HES) and national death  
108 and cancer registries. HES records diagnosis information via International Classification of Diseases  
109 (ICD)-9<sup>th</sup> and 10<sup>th</sup> Revisions and codes operative procedures via OPCS-4. Death registries include death  
110 date and both primary and secondary causes of death coded in ICD-10. We defined CAD by combining  
111 HES, death registries, operation codes,<sup>31,32</sup> as well as related self-reported diagnoses and previous proce-  
112 dure codes (Supplementary Tables 1 and 2). Following others,<sup>18</sup> CAD was defined as myocardial infarc-  
113 tion, including related sequelae.

114           The date of event was determined via recorded episode date, admission date, or operation date  
115 indicated in the hospital statistics. For participants with multiple CAD event dates, the earliest recorded  
116 date were used as the dates of event. Age of event was determined by self-reported age and calculated  
117 age based on the date of event; when both ages were available, the smaller value was used.<sup>15</sup> Prevalent  
118 cases at baseline were defined as individuals with age of event earlier than age at UK Biobank enroll-  
119 ment time. Follow-up time was calculated as the number of days from assessment date until the event  
120 of interest (CAD event), a competing cause of death, or censorship date (2020/12/31) occurred.

## 121 **Polygenic Risk Scores (PRS)**

122           Information on genotyping and imputation has been described in detail elsewhere.<sup>27,33</sup> Standard  
123 quality-control procedures were applied to the imputed UK Biobank genotype data. Briefly, we re-  
124 stricted our analyses to autosomal genetic variants, kept variants with imputation information score  
125 (INFO) score > 0.3, minor allele frequency > 1%, Hardy-Weinberg equilibrium  $P > 10^{-10}$ , and genotype  
126 missing rate < 10%. We further removed variants with ambiguous strands (A/T or C/G).

127           PRS for CAD were derived as weighted sums of risk alleles using 3 CAD GWAS datasets (CARDIo-  
128 GRAMplusC4D, FinnGen Biobank, Japan Biobank) that had no overlap with the present UK Biobank study

129 **(Figure 1).**<sup>8,9,25</sup> The 3 GWAS datasets were filtered to only include SNPs present in the imputed UK Bi-  
130 obank data. For all datasets, we aligned  $\beta$  and allele frequencies to the hg19 alternate allele. First, we  
131 performed a fixed-effect meta-analysis focused on GWAS datasets with subjects of European ancestry,  
132 specifically the CARDIoGRAMplusC4D and FinnGen datasets, using METAL.<sup>34</sup> Second, the PRSs were cal-  
133 culated by using either Japan Biobank data or combined European data and their corresponding popula-  
134 tion-specific 1000 Genome Project constructed LD reference panels.

135 Tuning of the PRS was implemented using seven methods: (1) clumping and thresholding using  
136 PRSice-2 software (version 2.3.3),<sup>35</sup> (2) LDpred,<sup>20</sup> (3) lassosum,<sup>36</sup> (4) PRS-CS,<sup>21</sup> (5) sBayesR,<sup>22</sup> (6) LDpred-  
137 funct,<sup>23</sup> and (7) DBSLMM.<sup>24</sup> Detailed information on each PRS method and their associated parameters  
138 are described in the eMethods section of Supplementary. All methods utilized were adjusted for geno-  
139 type measurement batch and the first five genetic principal components calculated by the UK Biobank.  
140 Since different PRS methods and datasets may capture different information, we constructed the inte-  
141 grated PRS by  $\sum_{j=1}^q \hat{\beta}_j PRS_j$ , where  $\hat{\beta}_j$  is the estimated coefficient of  $PRS_j$  in the logistic regression using  
142 the tuning dataset and  $PRS_j$  is the  $j^{\text{th}}$  PRS.<sup>37</sup> Selection of PRS methods for the integrated model was de-  
143 termined based on area under the curve (AUC) results from the tuning dataset. Methods with the largest  
144 AUC improvement over the PCE model were selected and analyzed in the testing dataset until the inclu-  
145 sion of additional PRS methods failed to improve the predictive performance of the integrated model.  
146 We assessed the performance of the integrated model against the individual PRS methods in the testing  
147 dataset as well as models combining the European meta-analysis data and Japan Biobank data.

## 148 **Statistical Analysis**

149 Participants were excluded from the study for multiple factors, including missing genetic data,  
150 mismatches in reported and genotypic sex, withdrawal of informed consent, and missing predictor val-  
151 ues. Using previously published baseline coefficients for each predictor variable and baseline hazard, we

152 calculated the updated pooled cohort equation scores (PCE).<sup>3</sup> We examined several models as defined in  
153 previous studies<sup>18,19</sup>: (1) PCE; (2) (integrated) PRS for CAD; and (3) PCE and (integrated) PRS. We per-  
154 formed Cox proportional hazard regression using follow-up time as the time variable in the testing data.  
155 As a sensitivity analysis, all models were reexamined after removing participants that reported taking  
156 lipid-lowering medications at baseline of the UK Biobank study.

157 We examined the discrimination of each model via Harrell's C-statistic and its 95% confidence  
158 interval.<sup>38,39,40</sup> In brief, the C-statistic is a measure of the discriminatory power of a risk prediction  
159 model, with values ranging from 0.5 (no discrimination) to 1.0 (perfect discrimination). Calibration and  
160 recalibration of the baseline models were graphically assessed by comparing observed probabilities via  
161 Kaplan-Meier estimates to the mean predicted probability within tenths of the predicted probabilities.  
162 During recalibration, the baseline survival function was estimated in the testing cohort and combined  
163 with predicted hazard ratios from the validation dataset in a Cox model to obtain recalibrated predicted  
164 probabilities.<sup>3,18</sup> We assessed the recalibration results via the calibration slope and Greenwood-Nam-  
165 D'Agostino test.<sup>41</sup>

166 We evaluated risk prediction accuracy using the net reclassification improvement (NRI)<sup>42</sup> at a  
167 threshold of 7.5% (clinically used in the United States), continuous NRI, and associated integrated dis-  
168 crimination improvement (IDI).<sup>43</sup> These metrics quantify how well a new model (PCE plus PRS) reclassi-  
169 fies individuals compared to an old model (PCE); a brief explanation of these metrics can be found in the  
170 eMethods section of the Supplementary.

171 Statistical analyses were conducted in R software, version 4.0.0 (R Project for Statistical Compu-  
172 ting).<sup>44</sup> Anaconda, version 3.8.3, was also used for PRS methods that utilized Python programming lan-  
173 guage.<sup>45</sup>

174 **Results**



175           Following removal of participants with missing data and selecting for only unrelated white Brit-  
176 ish participants, the UK Biobank dataset contained 291,305 participants which were subsequently di-  
177 vided into case-control and cohort study datasets (**Figure 1**). The case-control study contained 9,499  
178 prevalent CAD cases and an equal number of controls used for tuning of the PRS methods. The inde-  
179 pendent cohort study was comprised of 272,307 individuals (mean age: 56.7) with 7,036 incident cases.  
180 Participants with CAD at baseline were not included in the cohort study population. The cohort study  
181 had a median follow-up time of 12.33 years (interquartile range, 1.42), while incident CAD cases had a  
182 median follow-up time of 5.02 years (interquartile range, 4.07). Baseline characteristics (such as age,  
183 smoking status, cholesterol, and systolic blood pressure) were similar for participants included in the co-  
184 hort analysis and excluded due to missing covariates (Supplementary Tables 3A-3C).

185           For the case-control study, each PRS method for CAD was performed across multiple parameter  
186 settings to determine optimal values that would be combined for the cohort study. We classified the  
187 “optimal” parameter values as those achieving the highest AUC values for that individual method. Spe-  
188 cific details on each method’s tuning parameters and individual AUC values were provided in Supple-  
189 mentary Tables 4A and 4B for the European meta-analysis (EUR) and Japan Biobank (Japan) datasets.  
190 We combined the PRS for CAD based on the combination of the three GWAS datasets. As expected, be-  
191 cause the combined EUR + Japan methods fully utilized all three GWAS datasets and several comple-  
192 mentary PRS methods, it achieved the highest AUC [0.641 (95% CI, 0.635-0.648)] and thus we focused  
193 on this PRS (denoted by integrated CAD PRS or simply PRS) for the remaining analysis. The maximal inte-  
194 grated CAD PRS model for this study was determined to include the EUR and Japan derived clumping  
195 and thresholding, LDpred, lassosum, PRS-CS, and LDpred-funct methods. During this step, we evaluated  
196 the PRS methods for collinearity concerns and determined the different methods tended to not be  
197 highly correlated (Supplementary Figure 1).

198 In the cohort analysis, following selection of white British participants, as well as excluding indi-  
199 viduals with missing data, and selecting the case-control subjects, 272,307 participants were used. The  
200 discrimination of the integrated CAD PRS remained similar as that in tuning case-control study; the C-  
201 statistic for the integrated CAD PRS was 0.640 (95% CI, 0.634 -0.646) (**Table 1**). The discrimination of the  
202 PCE (C-statistics, 0.718 [95% CI, 0.713-0.723]) was higher than the integrated CAD PRS. Addition of indi-  
203 vidual PRSs to the PCE resulted in improved discrimination of the model with PRS-CS applied to the Eu-  
204 ropean meta-analysis showing the highest discrimination (C-statistics, 0.749 [95% CI, 0.744-0.754]) (Sup-  
205 plementary Table 5A-5C). We observed the most significant improvement in discrimination when the  
206 integrated CAD PRS were added to the PCE, showing a C-statistic increase to 0.753 (95% CI, 0.748-  
207 0.758), an associated change over the PCE alone of 0.035 (95% CI, 0.03 – 0.04) (**Table 1** and **Figure 2**).  
208 We further stratified the population by age group (younger and older than 55 years of age) and sex (men  
209 and women) separately and observed higher discrimination in women than men and higher discrimina-  
210 tion in the younger age group than in the older age group (**Table 1**). Participants that were not receiving  
211 lipid-lowering medication at baseline were also examined and demonstrated similar discrimination per-  
212 formance (**Table 1**).

213 **Table 1. C-Statistics for Coronary Artery Disease for Full Population and Stratified by Sex and Age**  
214 **Group (Younger and Older than 55 Years of Age) <sup>A,B</sup>**

215  
216  
217 **Figure 2. Receiver Operator Characteristic Curves and C-Statistics for Different Models in Cohort Analyses**  
218 **of White British and African Ancestry Populations**

219  
220  
221 When evaluating model performance, we compared observed and predicted cumulative inci-  
222 dences of CAD events across each tenth of predicted risk and determined the addition of our integrated  
223 PRS method to the baseline model overestimated risk. Following others,<sup>17,18</sup> we recalibrated the model

224 by fitting predicted log-HRs as covariates in the model, resulting in considerable improvement in model  
225 calibration (Supplementary Figure 2).

226 We investigated the potential of the PRS-enhanced PCE model in the risk assessment of CAD.  
227 We found that an individual's integrated CAD PRS were generally uncorrelated (Pearson correlation co-  
228 efficient  $r$ , 0.01) with their PCE, which partially explains why adding integrated CAD PRS to PCE model  
229 (denoted by PRS-enhanced PCE) improves the discrimination power. We evaluated the hazard ratios HR  
230 via a Cox regression. The PCE model had an adjusted HR of 1.653 (95% CI: 1.628-1.679) per standard de-  
231 viation increase ( $P < .001$ ) while the PRS-enhanced PCE model reported an adjusted HR of 1.77 (95% CI:  
232 1.745 - 1.796) per standard deviation increase of PRS ( $P < .001$ ). The PRS-enhanced PCE model further  
233 improves the discrimination power of PCE model (**Figure 3**). For example, in the PRS-enhanced PCE  
234 model, there was a 7.77-fold (95% CI: 7.61- to 7.92-fold) risk of CAD for individuals in the top quintile  
235 compared to those in the bottom quintile. The PCE model, in comparison, reported a 5.29-fold (95% CI:  
236 5.21- to 5.39-fold) risk of CAD between the top and bottom quintiles.

237 **Figure 3. Cumulative Absolute Risk of Developing CAD**

238

239 After adding PRS for CAD to the PCE model, predicted risk changed by greater than 1% for 35.5%  
240 of participants while changing by 5% or greater for 1.9% of participants (**Figure 4A**). There were 7,005  
241 incident CAD cases and 256,072 noncases at the 10-year follow-up; 9,230 individuals were censored due  
242 to lack of disease or follow-up at 10 years. At the suggested 7.5% risk threshold, 992 of 7,005 cases  
243 (14.2%) were correctly reclassified to the higher-risk category and 182 of 7,005 cases (2.6%) were incor-  
244 rectly moved to the lower-risk category. For non-case participants, 3,443 of 256,072 (1.3%) were cor-  
245 rectly moved down to the lower-risk category while 9,331 of 256,072 (3.6%) were incorrectly moved up  
246 to the high-risk category (**Figure 4B**).

247           When comparing integrated PRS for CAD model to the PCE model, the NRI for cases was 11.7%  
248 (95% CI, 10.2% to 12.9%) and -2.3% (95% CI, -2.5% to -2.2%) for noncases (**Figure 4C**). Following the ad-  
249 dition of the integrated CAD PRS to PCE, the IDI metric indicated an increase in risk difference between  
250 cases and noncases of 0.056 (95% CI, 0.053 to 0.059) (**Figure 4C**). Stratification by sex indicated higher  
251 NRI improvement in men over women; stratification by age group saw similar overall NRI improvement  
252 (Supplementary Table 6).

#### 253 **Figure 4. Change in Predicted Probabilities and Risk Reclassification**

254 A. Difference between 10-y risk by PCE and PRS-enhanced PCE

255 B. PCE + PRS 10-year risk reclassification

256

257 C. Net reclassification improvement and integrated discrimination improvement results

#### 258 **Secondary Analyses**

259           There were 6,971 participants in the AFR ancestry population that were divided into case-con-  
260 trol and cohort datasets. The case-control dataset consisted of 109 prevalent CAD cases and an equal  
261 number of controls. The cohort population was composed of 6,753 participants (median follow-up:  
262 12.75, interquartile range: 1.25) in which 88 incident CAD cases were observed (median follow-up: 5.97,  
263 interquartile range: 3.3). Baseline characteristics are presented in Supplementary Tables 3D-3F.

264           In case-control analysis, the optimized integrated CAD PRS model that achieved the highest AUC  
265 (0.717 [95% CI, 0.644-0.769]) was determined to include the EUR clumping and thresholding, LDpred,  
266 PRS-CS, and LDpred-funct methods as well as the Japan LDpred, PRS-CS, and sBayesR methods. In cohort  
267 analysis, the integrated CAD PRS C-statistic was 0.542 (95% CI, 0.485-0.6) (**Figure 1**). Discrimination of  
268 the PCE model (0.714 [95% CI, 0.659-0.769]) outperformed the integrated CAD PRS. In contrast to the  
269 White British population, the incremental value of the addition of the integrated CAD PRS to the PCE  
270 model was minimal (increase in C-statistic, .002 [95% CI, 0.006 to -0.001]) (**Table 1**). We further stratified  
271 by gender and age and observed higher discrimination in women and in the older age group, however,

272 we noticed slightly greater improvement in discrimination with the addition of our integrated CAD PRS  
273 in both men and the younger age group. Participants not on lipid-lowering medication at baseline saw  
274 slightly higher, but still minimal discrimination improvement than the full population (**Table 1**). NRI and  
275 IDI metrics were likewise minimal and incrementally smaller than in the White British population (Sup-  
276 plementary Table 7).

## 277 **Discussion**

279 In our analysis, the addition of genetic information to the PCE clinical risk score was associated  
280 with a moderate improvement in predictive accuracy for CAD. Addition of PRS to the baseline PCE model  
281 resulted in a 3.5% improvement in model concordance as well as a 9.3% net reclassification improve-  
282 ment (NRI) of incident CAD cases and noncases over the baseline PCE model at a 7.5% risk threshold. In  
283 comparison, the integrated risk tool<sup>17</sup> and Elliott et al.<sup>18</sup> achieved 2.7% (in European population) and  
284 4.0% (in all UK Biobank subjects) improvement in terms of NRI, respectively. While both studies improve  
285 the performance by integrating PRS into PCE, they reached different conclusions regarding its clinical  
286 utility, highlighting the importance of building a more powerful and accurate risk prediction model.

287 Our studies are innovative and are different from existing studies evaluating the clinical utility of  
288 adding PRS over existing clinical risk models<sup>18,19,46,47</sup> in the following aspects. While matching our defini-  
289 tion of CAD to that of a previous study performed with the UK Biobank,<sup>18</sup> we were able to take ad-  
290 vantage of more recent incident CAD data. We also utilized a stricter definition for our target population  
291 in the UK Biobank data as opposed to the entire UK Biobank data, which contain individuals of diverse  
292 ancestry. Recent studies have shown population-specific bias and limited use of specific PRS methods  
293 when used on non-European populations.<sup>48,49</sup> We also used three distinct GWAS datasets to build the  
294 PRS and integrated results from several advanced and more recent PRS methods,<sup>21,22,23,24</sup> improving the  
295 discrimination power of our integrated CAD PRS.

296 We found that integrating PRS to baseline PCE model resulted in significant continuous and cat-  
297 egorical NRI. Categorical NRI for incident cases was 11.7% and -2.3% for noncases. Our model greatly  
298 improved reclassification for cases over previous studies,<sup>17,18,19</sup> but resulted in more misclassification in  
299 non-case individuals. This difference in performance for noncases may be due in part to model specifica-  
300 tions and cohort selection. In contrast to Moseley et al,<sup>19</sup> in which the 2013 PCE model was used, we uti-  
301 lized the updated 2018 PCE as our baseline. The 2013 model was noted to overestimate risk across all  
302 risk groups, prompting the development of the updated PCE model.<sup>3</sup> We also used a younger cohort  
303 compared to the two cohorts in Moseley et al (mean age 56.7 years compared to 62.9 and 61.8, respec-  
304 tively). As noted, we included only White British ancestry in our primary cohort. The inclusion of other  
305 ethnicities in the cohort may significantly decrease the discrimination power of the PRS constructed.  
306 This is shown in our secondary analysis of African ancestry, where the PRS results based on a European  
307 ancestry GWAS dataset vastly underperformed compared to the White British population (C-statistics  
308 0.715 vs 0.752, respectively) (Supplementary Table 5).

309 Our results suggest an association between predictive accuracy of PRS and incident CAD events  
310 that varies based on age and sex. Men showed significantly higher C-statistic improvement than women  
311 (0.051 vs 0.035) in the PRS-enhanced PCE model over the baseline PCE model. This is complemented by  
312 an 11.6% overall categorical NRI improvement in men compared to 3.6% in women (Supplementary Ta-  
313 ble 6). Recent studies using PRS in the UK Biobank demonstrated comparable results with higher risks  
314 for incident CAD in men than women.<sup>15,47,50</sup> The improved performance in men may be attributed to  
315 overrepresentation of male CAD cases in the case-control and cohort studies. The use of sex-specific  
316 data may lead to improved prediction accuracy of PRS.

317 Our results also suggest a genetic component to early-onset cases of CAD and a possible applica-  
318 tion of PRS in identifying individuals at heightened risk of these cases, as the predictive accuracy of inci-  
319 dent CAD cases was higher in participants < 55 years of age. The observed C-statistic for the integrated

320 PRS-enhanced PCE model was 0.793 compared to 0.705 observed in the  $\geq 55$  age group. This observa-  
321 tion supports two recent studies that found high risk score predictions in genetic variants strongly asso-  
322 ciated with early-onset CAD ( $<40$  years old) as well as improved risk classification of early-onset CAD to  
323 higher-risk categories that were not classified as such by PCE.<sup>9,51</sup>

324 There are limitations in our study. First, our study was conducted in the UK Biobank and is,  
325 therefore, limited by the characteristics of the cohort. The UK Biobank cohort is composed of primarily  
326 European ancestries (further restricted to White British ancestry in this study) and limited to an age  
327 range of 40 to 69 years, restricting its application to other ancestries and age groups. In addition, partici-  
328 pants in the UK Biobank assessment tend to be healthier and more well-off compared to the general UK  
329 population,<sup>52</sup> and thus population-level CAD risk may be underestimated in our study. In secondary anal-  
330 ysis, the limited genetic diversity of the UK Biobank cohort is apparent and resulted in significantly  
331 smaller tuning and testing. The extent to which our results can be applied to larger non-European ances-  
332 tries, in particular African ancestry, warrants further investigation. These results also highlight the ur-  
333 gency of developing novel cross-ancestry PRS methods<sup>10,17,53,54,55</sup> and using more diverse cohorts to con-  
334 struct PRSs.<sup>17</sup> In addition, as the case-control and cohort analyses are derived from the same study,  
335 more broad generalizability of the results requires further investigation. Second, this study included PRS  
336 for low frequency and common genetic variants ( $MAF \geq 1\%$ ) and did not examine the predictive accu-  
337 racy of rare variants known to affect CAD risk. Third, the algorithm for selection of CAD cases utilizes  
338 self-report, death, and hospital inpatient data for the definition of prevalent and incident CAD cases. As  
339 such, misclassification of cases is possible. Fourth, tuning of each PRS method in the case-control study  
340 used prevalent CAD cases, which could introduce survival bias. However, simulation studies have  
341 demonstrated a limited effect of survival bias on estimated genetic effects of event risks.<sup>56</sup> Fifth, partici-  
342 pants with at least 1 missing predictor value were excluded from the study. Excluded participants were

343 not considerably different demographically from those included and thus the missing data are unlikely  
344 to have a significant effect on the reported estimates.

### 345 **Conclusions**

346 Addition of the integrated CAD PRS to the PCE resulted in a statistically significant improvement  
347 in predictive accuracy for incident CAD, especially in individuals under the age of 55 years old in White  
348 British population. It was also associated with moderate improvement in risk reclassification across all  
349 subgroups. However, the benefits of adding integrated CAD PRS to the PCE are minimal for African pop-  
350 ulation. In summary, the inclusion of genetic information to the pooled cohort equation can help im-  
351 prove clinical risk classification and demonstrates the potential for genetic screening in early life to im-  
352 prove clinical risk prediction in White British population.

353

354

### 355 **Abbreviations**

356 Cardiovascular disease (CVD); pooled cohort equations (PCE); coronary artery disease (CAD); polygenic  
357 risk score (PRS); genome-wide association study (GWAS); African (AFR); East Asian (EAS); European  
358 (EUR); South Asian (SAS); hospital episode statistics (HES); area under the curve (AUC); net reclassifica-  
359 tion improvement (NRI); integrated discrimination improvement (IDI); confidence interval (CI)

### 360 **References**

- 361 1. GBD 20019 Disease and Injuries Collaborators. Global burden of 369 diseases and injuries in 204  
362 countries and territories, 1990-2019: a systematic analysis for the Global Burden of Disease Study 2019.  
363 *Lancet*. 2020; 396(10258):1204-1222.
- 364 2. Damen JA, Hooft L, Schuit E, et al. Prediction models for cardiovascular disease risk in the general  
365 population: systematic review. *BMJ*. 2016;353:i2416.



- 366 3. Yadlowsky S, Hayward RA, Sussman JB, McClelland RL, Min YI, Basu S. Clinical implications of revised  
367 pooled cohort equations for estimating atherosclerotic cardiovascular disease risk. *Ann Intern Med*.  
368 2018;169(1):20-29.
- 369 4. Conroy R, Pyörälä K, Fitzgerald A, et al. Estimation of ten-year risk of fatal cardiovascular disease in  
370 Europe: The SCORE project. *European Heart Journal*. 2003;24(11):987-1003.
- 371 5. D'Agostino R, Vasan R, Pencina M, et al. General Cardiovascular Risk Profile for Use in Primary Care.  
372 *Circulation*. 2008;117(6):743-753.
- 373 6. Arnett DK, Blumenthal RS, Albert MA, et al. 2019 ACC/AHA guideline on the primary prevention of  
374 cardiovascular disease: a report of the American College of Cardiology/American Heart Association Task  
375 Force on Clinical Practice Guidelines. *J Am Coll Cardiol*. 2019;74(10):e177-e232.
- 376 7. Musunuru K, Kathiresan S. Genetics of common, complex coronary artery disease. *Cell*.  
377 2019;177(1):132-145.
- 378 8. Nikpay M, Goel A, Won HH, et al. A comprehensive 1,000 Genomes-based genome-wide association  
379 meta-analysis of coronary artery disease. *Nat Genet*. 2015;47(10):1121-1130.
- 380 9. Mars N, Koskela J, Ripatti P, et al. Polygenic and clinical risk scores and their impact on age at onset  
381 and prediction of cardiometabolic diseases and common cancers. *Nat Med*. 2020;26(4):549-557.
- 382 10. Koyama S, Ito K, Terao C, et al. Population-specific and trans-ancestry genome-wide analyses identify  
383 distinct and shared genetic risk loci for coronary artery disease. *Nat Genet*. 2020;52(11):1169-1177.
- 384 11. Knowles J, Ashley E. Cardiovascular disease: The rise of the genetic risk score. *PLOS Medicine*.  
385 2018;15(3):e1002546.
- 386 12. Torkamani A, Wineinger N, Topol E. The personal and clinical utility of polygenic risk scores. *Nature*  
387 *Review Genetics*. 2018;19(9):581-590.
- 388 13. Wise A, Manolio T, Mensah G, et al. Genomic medicine for undiagnosed diseases. *Lancet*.  
389 2019;394(10197):533-540.
- 390 14. Claussnitzer M, Cho J, Collins R, et al. A brief history of human disease genetics. *Nature*.  
391 2020;577(7789):179-189.
- 392 15. Inoyue M, Abraham G, Nelson C, et al. Genomic Risk Prediction of Coronary Artery Disease in  
393 480,000 Adults: Implications for Primary Prevention. *J Am Coll Cardiol*. 2018;72(16):1883-1893.
- 394 16. Khera AV, Chaffin M, Aragam KG, et al. Genome-wide polygenic scores for common diseases identify  
395 individuals with risk equivalent to monogenic mutations. *Nat Genet*. 2018;50(9):1219-1224.
- 396 17. Weale M, Riveros-McKay F, Selzam S, et al. Validation of an Integrated Risk Tool, Including Polygenic  
397 Risk Score, for Atherosclerotic Cardiovascular Disease in Multiple Ethnicities and Ancestries. *Am J Cardiol*.  
398 2021;148:157-164.
- 399 18. Elliott J, Bodinier B, Bond T, et al. Predictive Accuracy of a Polygenic Risk Score-Enhanced Prediction  
400 Model vs a Clinical Risk Score for Coronary Artery Disease. *JAMA*. 2020;323(7):636-645.
- 401 19. Mosley J, Gupta D, Tan J, et al. Predictive Accuracy of a Polygenic Risk Score Compared with a Clinical  
402 Risk Score for Incident Coronary Heart Disease. *JAMA*. 2020;323(7):627-635.

- 403 20. Vilhjálmsson B, Yang J, Finucane H, et al. Modeling Linkage Disequilibrium Increases Accuracy of Polygenic Risk Scores. *American Journal of Human Genetics*. 2015;97(4):576-592.  
404
- 405 21. Ge T, Chen C, Ni Y, et al. Polygenic prediction via Bayesian regression and continuous shrinkage priors. *Nature Communications*. 2019;10(1).  
406
- 407 22. Lloyd-Jones L, Zeng J, Sidorenko J, et al. Improved polygenic prediction by Bayesian multiple regression on summary statistics. *Nature Communications*. 2019;10(1).  
408
- 409 23. Márquez-Luna C, Gazal S, Loh P, et al. LDpred-funct: incorporating functional priors improves polygenic prediction accuracy in UK Biobank and 23andMe data sets. *bioRxiv*. 2018;375337.  
410
- 411 24. Yang S, Zhou X. Accurate and Scalable Construction of Polygenic Scores in Large Biobank Data Sets. *American Journal of Human Genetics*. 2020;106(5):679-693.  
412
- 413 25. Nagai A, Hirata M, Kamatani Y, et al. Overview of the BioBank Japan Project: Study design and profile. *Journal of Epidemiology*. 2017;27(3):S2-S8.  
414
- 415 26. Sudlow C, Gallacher J, Allen N, et al. UK biobank: an open access resource for identifying the causes of a wide range of complex diseases of middle and old age. *PLoS Med*. 2015;12(3):e1001779.  
416
- 417 27. UK Biobank. Biomarker assay quality procedures: approaches used to minimize systematic and random errors (and the wider epidemiological implications): version 1.2. [https://biobank.ctsu.ox.ac.uk/crysal/cyrstal/docs/biomarker\\_issues.pdf](https://biobank.ctsu.ox.ac.uk/crysal/cyrstal/docs/biomarker_issues.pdf). Published April 2, 2019. Accessed August 10, 2021.  
418  
419
- 420 28. Bycroft C, Freeman C, Petkova D, et al. The UK Biobank resource with deep phenotyping and genomic data. *Nature*. 2018;562(7726):203-209.  
421
- 422 29. Wang Y, Guo J, Ni G, et al. Theoretical and empirical quantification of the accuracy of polygenic scores in ancestry divergent populations. *Nature Communications*. 2020;11:3865.  
423
- 424 30. Backman J, Li A, Marcketta A, et al. Exome sequencing and analysis of 454,787 UK Biobank participants. *Nature*. 2021;599:628-634.  
425
- 426 31. Hippisley-Cox J, Coupland C, Vinogradova Y, et al. Predicting cardiovascular risk in England and Wales: prospective derivation and validation of QRISK2. *BMJ*. 2008;336(7659):1475-1482.  
427
- 428 32. Hippisley-Cox J, Coupland C, Brindle P. Development and validation of QRISK3 risk prediction algorithms to estimate future risk of cardiovascular disease: prospective cohort study. *BMJ*. 2017;357:j2099.  
429
- 430 33. UK Biobank. Genotype imputation and genetic association studies of UK Biobank: interim data release. [http://www.ukbiobank.ac.uk/wp-content/uploads/2014/04/imputation\\_documentation\\_May2015.pdf](http://www.ukbiobank.ac.uk/wp-content/uploads/2014/04/imputation_documentation_May2015.pdf).  
431  
432 Published May 2015. Accessed January 10, 2019.
- 433 34. Willer C, Li Y, Abecasis G. METAL: Fast and efficient meta-analysis of genome wide association scans. *Bioinformatics*. 2010;26(17):2190-2191.  
434
- 435 35. Choi S, Mak T, O'Reilly P. Tutorial: a guide to performing polygenic risk score analyses. *Nature Protocols*. 2020;15(9):2759-2772.  
436
- 437 36. Mak T, Porsch R, Choi S, et al. Polygenic scores via penalized regression on summary statistics. *Genetic Epidemiology*. 2017;41(6):469-480.  
438

- 439 37. Wu C, Zhu J, King A, et al. Novel strategy for disease risk prediction incorporating predicted gene ex-  
440 pression and DNA methylation data: a multi-phased study of prostate cancer. *Cancer Communications*.  
441 2021;41(12):1387-1397.
- 442 38. SOMERSD. Stata module to calculate Kendall's tau-a, Somers' D. and median differences [computer  
443 program]. Version S336401: Boston College Department of Economics; 1998.
- 444 39. Harrell FE Jr, Califf RM, Pryor DB, Lee KL, Rosati RA. Evaluation the yield of medical tests. *JAMA*.  
445 1982;247(18):2543-2546.
- 446 40. Newson R. Parameters behind "nonparametric" statistics: Kendall's tau, Somers' D and median dif-  
447 ferences. *Stata J*. 2002;2(1):45-64.
- 448 41. Demler O, Paynter N, Cook N. Tests of calibration and goodness-of-fit in the survival setting. *Statis-  
449 tics in Medicine*. 2015;34(10):1659-1980.
- 450 42. Leening M, Vedder M, Witteman J, et al. Net Reclassification Improvement: Computation, Interpre-  
451 tation, and Controversies A Literature Review and Clinician's Guide. *Ann Intern Med*. 2014;160:122-131.
- 452 43. Pencina MJ, Steyerberg EW, D'Agostino RB Sr. Net reclassification index at event rate: properties  
453 and relationships. *Stat Med*. 2017;36(28):4455-4467.
- 454 44. The R Project for Statistical Computing [computer Program]. Version 4.0.0, Vienna, Austria: 2013.
- 455 45. Anaconda Software Distribution [Internet]. Anaconda Documentation. Anaconda Inc.; 2020. Availa-  
456 ble from: <https://docs.anaconda.com/>
- 457 46. Aragam K, Dobbyn A, Judy R. et al. Limitations of Contemporary Guidelines for Managing Patients at  
458 High Genetic Risk of Coronary Artery Disease. *J Am Coll Cardiol*. 2020;75(22):2769-2780.
- 459 47. Riveros-McKay F, Weale M, Moore R, et al. Integrated Polygenic Tool Substantially Enhances Coro-  
460 nary Artery Disease Prediction. *Circulation: Genomic and Precision Medicine*. 2021; 14(2):e003304.
- 461 48. Gola D, Erdmann J, Läll K, et al. Population Bias in Polygenic Risk Prediction Models for Coronary Ar-  
462 tery Disease. *Circulation: Genomic and Precision Medicine*. 2020;13(6):e002932.
- 463 49. Matsunaga H, Ito K, Akiyama M, et al. Transethnic Meta-Analysis of Genome-Wide Association Stud-  
464 ies Identifies Three New Loci and Characterizes Population-Specific Differences for Coronary Artery Dis-  
465 ease. *Circulation: Genomic and Precision Medicine*. 2020;13(3):e002670.
- 466 50. Manikpurage H, Eslami A, Perrot N, et al. Polygenic Risk Score for Coronary Artery Disease Improves  
467 the Prediction of Early-Onset Myocardial Infarction and Mortality in Men. *Circulation: Genomic and Preci-  
468 sion Medicine*. 2021;14(6):e003452.
- 469 51. Thériault S, Lali R, Chong M, et al. Polygenic Contribution in Individuals With Early-Onset Coronary  
470 Artery Disease. *Circulation: Genomic and Precision Medicine*. 2018;11(1).
- 471 52. Fry A, Littlejohns T, Sudlow C, et al. Comparison of Sociodemographic and Health-Related Character-  
472 istics of UK Biobank Participants with Those fo the General Population. *American Journal of Epidemiology*.  
473 2017;186(9):1026-1034.
- 474 53. Fritsche L, Ma Y, Zhang D, et al. On cross-ancestry cancer polygenic risk scores. *PLoS Genet*.  
475 2021;17(9):e1009670.

- 476 54. Chen C, Han J, Hunter D, Kraft P, Price A. Explicit Modeling of Ancestry Improves Polygenic Risk  
477 Scores and BLUP Prediction. *Genetic Epidemiology*. 2015;39(6):427-438.
- 478 55. Cai M, Xiao J, Zhang S, et al. A unified framework for cross-population trait prediction by leveraging  
479 the genetic correlation of polygenic traits. *AJHG*. 2021;108(4):632-655.
- 480 56. Hu YJ, Schmidt AF, Dudbridge F, et al; The GENIUS-CHD Consortium. Impact of selection bias on esti-  
481 mation of subsequent event risk. *Circ Cardiovasc Genet*. 2017;10(5):e001616.
- 482

483 **Figure 1. Study Design and Flowchart for Coronary Artery Disease (CAD)**

484 A. Selection of PRS in case-control study

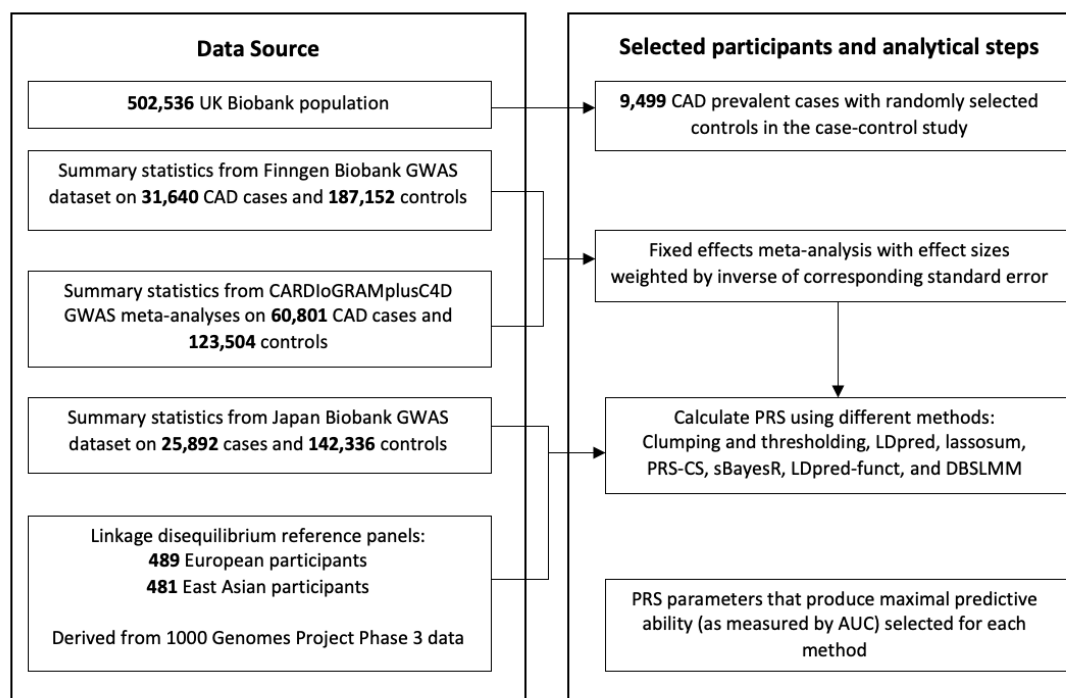

485

486 B. Cohort Study

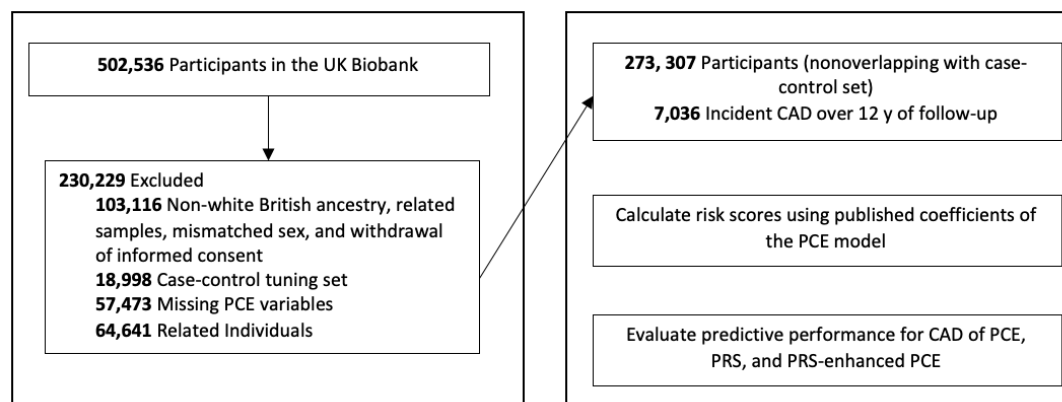

487

488

489

490

491

492

493

494

495

496

497

To select the parameters for each method with the best discrimination based on area under the curve (AUC), clumping and thresholding, LDpred, lassosum, PRS-CS, sBayesR, LDpred-funct, and DBSLMM were used to calculate polygenic risk scores (PRS) on the case-control set consisting of prevalent cases. For these calculations, summary data for three genome-wide association studies (GWAS) on CAD (CARDIoGRAM-plusC4D, FinnGen Biobank, Japan Biobank) that excluded UK Biobank and data on linkage disequilibrium were used. The calculated PRS were applied to a nonoverlapping set of participants from the UK Biobank with no preexisting CAD, aged 40 to 69 at baseline, and who were followed up for incident CAD events. In this population, the pooled cohort equations (PCE) model was calculated and different models (PRS, PCE, PRS-enhanced PCE) were compared in terms of their predictive accuracy based on discrimination, calibration, and reclassification metrics.

498 **Table 1. C-Statistics for Coronary Artery Disease for Full Population and Stratified by Sex and Age**  
 499 **Group (Younger and Older than 55 Years of Age)<sup>1,2</sup>**

| C-Statistic (95% CI)                          |                  |                  |                  |                         |                          |                                                                 |
|-----------------------------------------------|------------------|------------------|------------------|-------------------------|--------------------------|-----------------------------------------------------------------|
|                                               | All              | Men              | Women            | Participants Aged <55 y | Participants Aged ≥ 55 y | Participants Not Receiving Lipid-Lowering Treatment at Baseline |
| <b>A. White British Ancestry</b>              |                  |                  |                  |                         |                          |                                                                 |
| Participants, No.                             | 272307           | 124155           | 148152           | 102330                  | 169977                   | 235172                                                          |
| Cases, No.                                    | 7036             | 5093             | 1943             | 1276                    | 5760                     | 5091                                                            |
| Polygenic risk score                          | .64 (.634-.646)  | .643 (.636-.651) | .641 (.629-.654) | .69 (.626-.705)         | .632 (.625-.639)         | .646 (.638-.653)                                                |
| Pooled cohort equation                        | .718 (.713-.723) | .663 (.656-.67)  | .706 (.695-.717) | .749 (.736-.761)        | .665 (.658-.671)         | .73 (.724-.737)                                                 |
| Polygenic risk score + pooled cohort equation | .753 (.748-.758) | .714 (.708-.721) | .741 (.73-.751)  | .793 (.781-.806)        | .705 (.699-.712)         | .766 (.76-.772)                                                 |
| <b>B. African Ancestry</b>                    |                  |                  |                  |                         |                          |                                                                 |
| Participants, No.                             | 6753             | 2901             | 3852             | 4528                    | 2225                     | 5896                                                            |
| Cases, No.                                    | 88               | 46               | 42               | 42                      | 46                       | 63                                                              |
| Polygenic risk score                          | .542 (.485-.6)   | .574 (.494-.654) | .6 (.511-.634)   | .548 (.46-.637)         | .543 (.462-.624)         | .534 (.464-.604)                                                |
| Pooled cohort equation                        | .714 (.659-.769) | .674 (.595-.753) | .734 (.653-.815) | .657 (.572-.742)        | .721 (.656-.787)         | .698 (.628-.768)                                                |
| Polygenic risk score + pooled cohort equation | .716 (.665-.768) | .695 (.622-.768) | .732 (.654-.81)  | .679 (.597-.761)        | .696 (.629-.763)         | .707 (.64-.774)                                                 |

500 1. Cox proportional hazard models for CAD using recalibrated polygenic risk score, pooled cohort equations, and both combined  
 501 models. 2. C-Statistics shown for combined European meta-analysis + Japan Biobank PRS methods. Results are presented for  
 502 both White British and African ancestry populations.

503

504

505

506

507

508 **Figure 2. Receiver Operator Characteristic Curves and C-Statistics for Different Models in Cohort Analyses**  
509 **of White British and African Ancestry Populations**

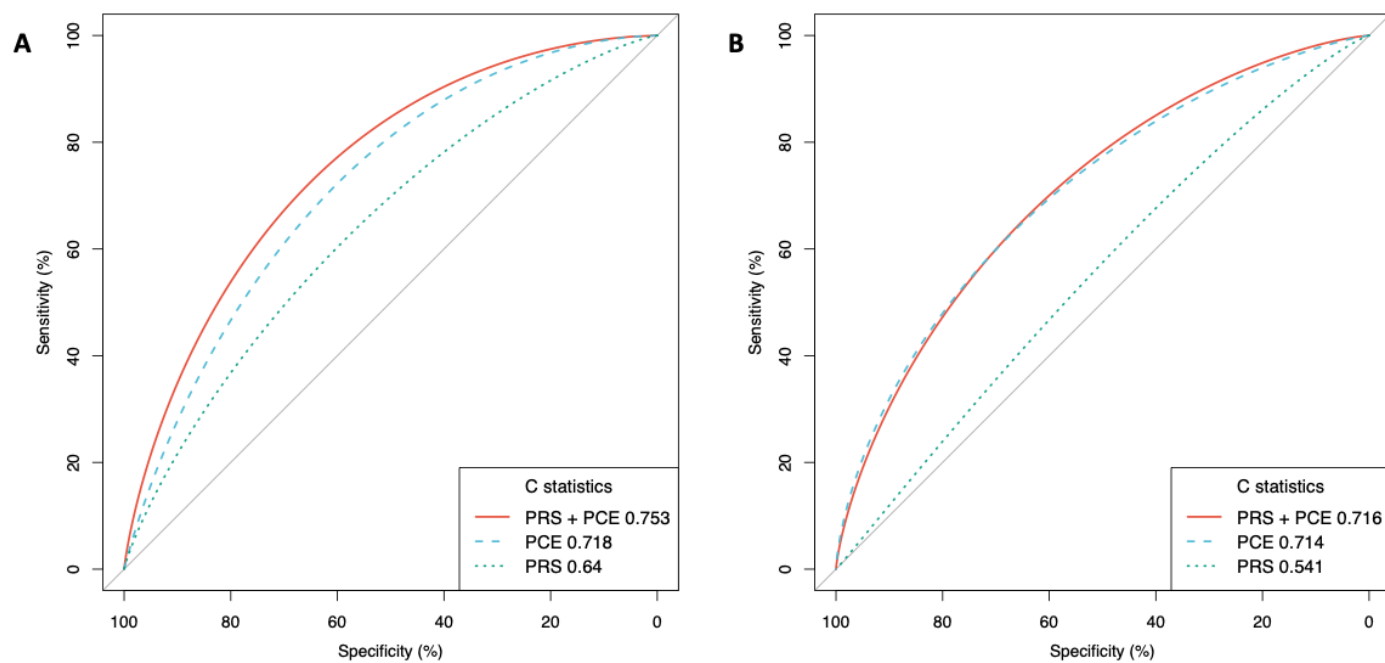

510 PCE indicates pooled cohort equation; PRS indicates integrated polygenic risk score. A) is the White British population of 272,307 individuals  
511 over a mean 12 years of follow-up with 7036 incident CAD cases and B) is the African ancestry population of 6,753 individuals over a mean 13  
512 years of follow-up with 88 incident CAD cases.  
513

514

515 **Figure 3. Cumulative Absolute Risk of Developing CAD**

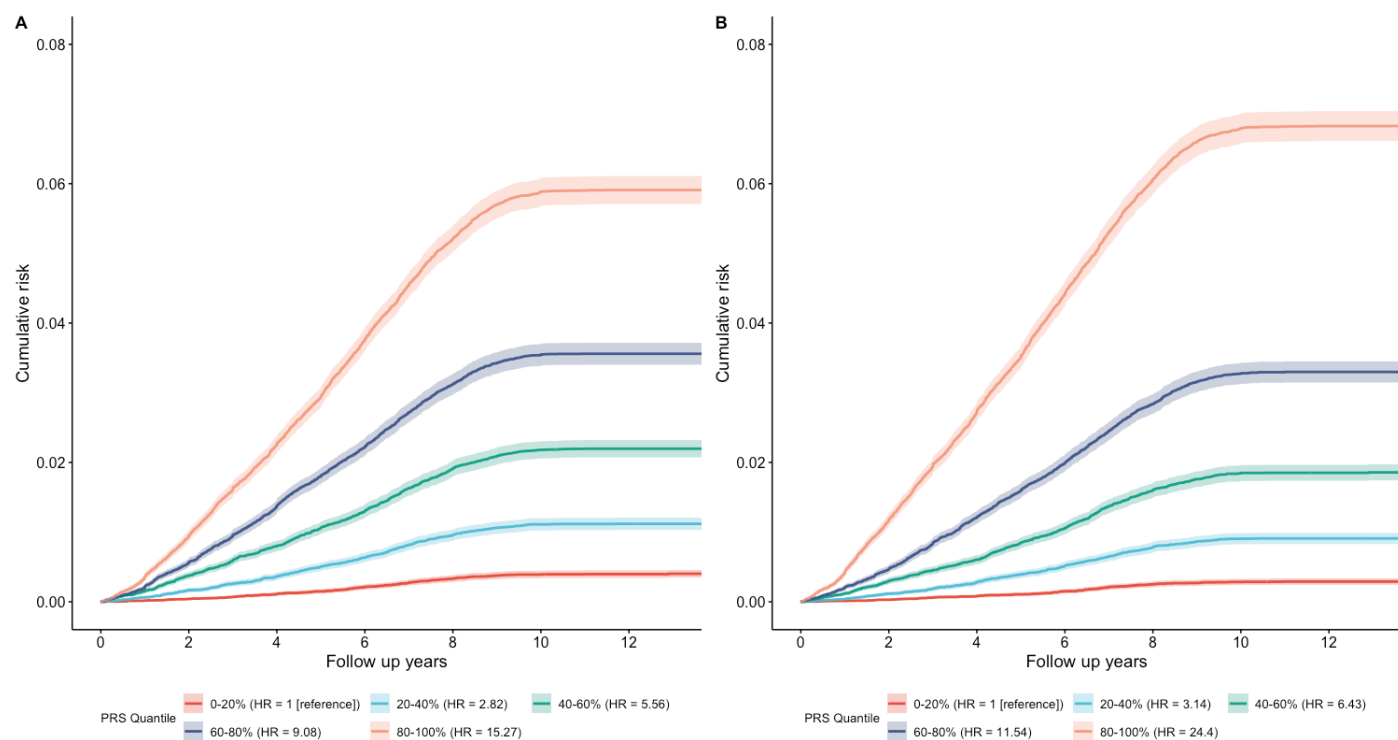

516  
517 Cumulative absolute risk of developing CAD by quintiles of the overall polygenic score in **A)** the PCE model and **B)** the PRS-en-  
518 hanced PCE model. The shaded portions correspond to the 95% confidence interval.

519

520

521

522



523 **Figure 4. Change in Predicted Probabilities and Risk Reclassification**

524 A. Difference between 10-y risk by PCE and PRS-enhanced PCE

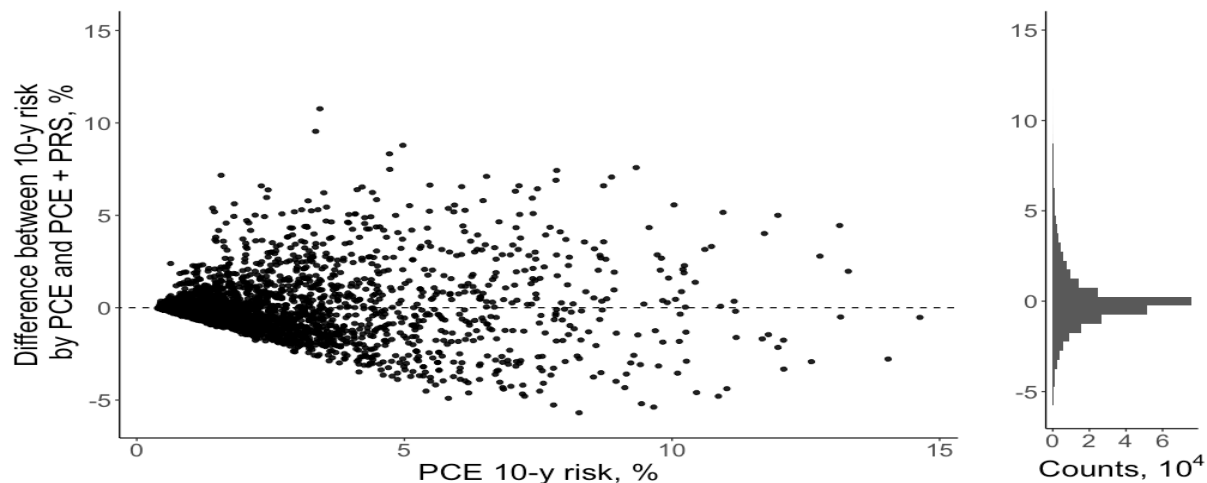

525

526

527 B. PCE + PRS 10-year risk reclassification

| Threshold,<br>% | PCE + PRS Risk Threshold, % |       | % Reclassified | Improved<br>Classification |
|-----------------|-----------------------------|-------|----------------|----------------------------|
|                 | < .75                       | ≥ 7.5 |                |                            |
| <b>Cases</b>    |                             |       |                |                            |
| < 7.5           | 5098                        | 992   | 14.2           | +                          |
| ≥ 7.5           | 182                         | 733   | 2.6            | -                          |
| <b>Noncases</b> |                             |       |                |                            |
| < 7.5           | 236916                      | 9331  | 3.6            | -                          |
| ≥ 7.5           | 3443                        | 6382  | 1.3            | +                          |

528

529

530

531

532

533

534 C. Net reclassification improvement and integrated discrimination improvement results

|                 | No. of Participants | Continuous Net<br>Reclassification<br>Improvement | Categorical Net<br>Reclassification<br>Improvement | Integrated<br>Discrimination<br>Improvement |
|-----------------|---------------------|---------------------------------------------------|----------------------------------------------------|---------------------------------------------|
| Cases           | 7036                | 0.215 (0.194 to 0.228)                            | 0.117 (0.102 to 0.129)                             |                                             |
| Noncases        | 256072              | 0.235 (0.224 to 0.25)                             | -0.023 (-0.025 to -0.022)                          |                                             |
| Full Population | 263108              | 0.45 (0.423 to 0.478)                             | 0.093 (0.08 to 0.104)                              | 0.0564 (0.0534 to 0.0594)                   |
| Censored        | 9230                |                                                   |                                                    |                                             |

535  
 536 A, Change in the predicted probabilities of the recalibrated pooled cohort equations (PCE) model after the addition of polygenic risk scores  
 537 (PRS) for CAD. The x-axis shows the predicted probability from the baseline PCE model. The y-axis is the difference in 10-year risk probabilities  
 538 of a CAD event between the PRS-enhanced model and the baseline PCE model. The scatterplot has a random draw of 1% of the participants  
 539 shown. The histogram x- and y-axes are based on the full population. B, Reclassification table of predicted probabilities by PCE and PRS-en-  
 540 hanced PCE models at 7.5% threshold. Rows indicating an improved classification with the PRS-enhanced PCE model are marked by a plus sign  
 541 while rows indicating a deteriorated classification are marked by a minus sign. C, Table of net reclassification improvement (NRI) and integrated  
 542 discrimination improvement (IDI). NRI<sup>a</sup> is defined in the continuous case as the sum of proportions of cases and noncases with improved com-  
 543 bined score minus the sum of proportions with deteriorated combined score. In the categorical case, NRI is defined by changed at a 7.5%  
 544 threshold predicted probability. A positive NRI indicates a better combined score overall. IDI<sup>b</sup> measures the difference of average probabilities  
 545 of an event in cases and noncases. A larger IDI indicates more discrimination in the combined score.

546 <sup>a</sup> NRI = P(up|case) - P(down|case) - P(up|noncase) + P(down|noncase) <sup>b</sup> IDI = P<sub>PCE+PRS</sub>(case) - P<sub>PCE+PRS</sub>(noncase) - P<sub>PCE</sub>(case) + P<sub>PCE</sub>(noncase)

547
